# Supplementary material for: Social isolation and loneliness in adults over 50 with high autistic traits.
Source: Research Square preprint supplement (doi:10.21203/rs.3.rs-6838818/v1), 2025-09-30
Supplement: Supplementary file 1 [file 15e1ec2efc5fffeb543ef2e9.docx]

**SUPPLEMENTARY MATERIALS**

**Assumption Testing**

Scores on the GAD-7, PHQ-9, UCLA-3, CTS-5 and ATS-5 had a positively skewed distribution. However the analyses that they were used in are robust enough to work with this: path analysis produces a consistent maximum likelihood estimator even if observed variables are non-normal (Bollen, 1989); estimates of regression coefficients in linear regression remain unbiased even if variables are not normally distributed (Tabachnick & Fidell, 2013). Scores on the LSNS-6 had a normal distribution.

The ‘car’ package was used to calculate Variance Inflation Factor (VIF) for the regressions, which indicated a low degree of multicollinearity (aloof personality VIF = 1.38, rigid personality VIF = 1.51, pragmatic language difficulties VIF = 1.34; James et al., 2013).

We also conducted linear hypothesis tests on individual regression coefficients to determine whether there was a significant difference in the amount of variance that different predictors explained. In the loneliness model, White’s test suggested that the distribution was heteroscedastic, (χ²(1) = 6.10, *p* = .014) and a Shapiro-Wilk test indicated that the residuals were not normally distributed(*W* = 0.966, *p* <.001). To account for these violations of assumptions, robust standard errors were used to adjust the standard errors of the regression coefficients, providing more reliable inference (Hayes & Chi, 2007). The social isolation model did not violate the assumptions (*χ*²(1) = 0.003, *p* = .954; *W* = 0.99, *p* = .577).

**Missing Data**

A Missing Completely at Random (MCAR) test was run to assess whether there were patterns in the five measures that had missing data (17% missing data of PHQ-9 and GAD-7, 28% missing data of CTS and ATS, 54% missing data of the informant-report BAPQ (none missing for self-report)). The Anderson-Darling rank test yielded AD = 206.15, p <.0001, suggesting that the data were not missing completely at random. Full information maximum likelihood (FIML) was thus used to account for missing data (Enders, 2001).

When looking at possible demographic differences between participants with missing data and those without, there was no significant difference in AT group (χ2(1) = 1.10, p = .294), sex (χ2(1) = 2.73, p = .098), ethnicity (χ2(17) = 16.03, p = .521), marriage status (χ2(6) = 2.55, p = .863), education (χ2(5) = 5.79, p = .327), or volunteering status (χ2(5) = 3.145, p = .678).

There was a difference in age (t(2310) = -2.44, p = .015; Cohen’s d = -.07; participants with missing data older) and in employment status (χ2(4) = 20.99, p <.001; Cramer’s V = .05; participants with missing data more likely to be retired), however the effect sizes indicated that the differences were trivial (Ferguson, 2009).
